# Supplementary material for: Piezoelectric nanofiber/polymer composite membrane for noise harvesting and active acoustic wave detection
Source: Royal Society of Chemistry journal article supplement (doi:10.1039/c9na00484j), 2019-01-01
Supplement: c9na00484j1.pdf [file c9na00484j1.pdf]

## Supplementary information

### **Piezoelectric Nanofiber/Polymer Composite Membrane for Noise Harvesting and Active Acoustic Wave Detection**

*Nuanyang Cui<sup>‡a,b</sup>, Xiaofeng Jia<sup>‡a</sup>, Anan Lin<sup>a</sup>, Jinmei Liu<sup>a</sup>, Suo Bai<sup>a</sup>, Lu Zhang<sup>a</sup>, Yong Qin<sup>a,\*</sup>, Rusen Yang<sup>b,\*</sup>, Feng Zhou<sup>c</sup> and Yongqing Li<sup>d,\*</sup>*

<sup>a</sup>Institute of Nanoscience and Nanotechnology, Lanzhou University, Gansu 730000, China

<sup>b</sup>School of Advanced Materials and Nanotechnology, Xidian University, 710071, China

<sup>c</sup>State Key Laboratory of Solid Lubrication, Lanzhou Institute of Chemical Physics, Chinese Academy of Sciences, Lanzhou, 730000 China

<sup>d</sup>College of Naval Architecture and Ocean Engineering, Naval University of Engineering, Wuhan 430033, China

\*Corresponding author email: qinyong@lzu.edu.cn

rsyang@xidian.edu.cn

liyongqing@126.com

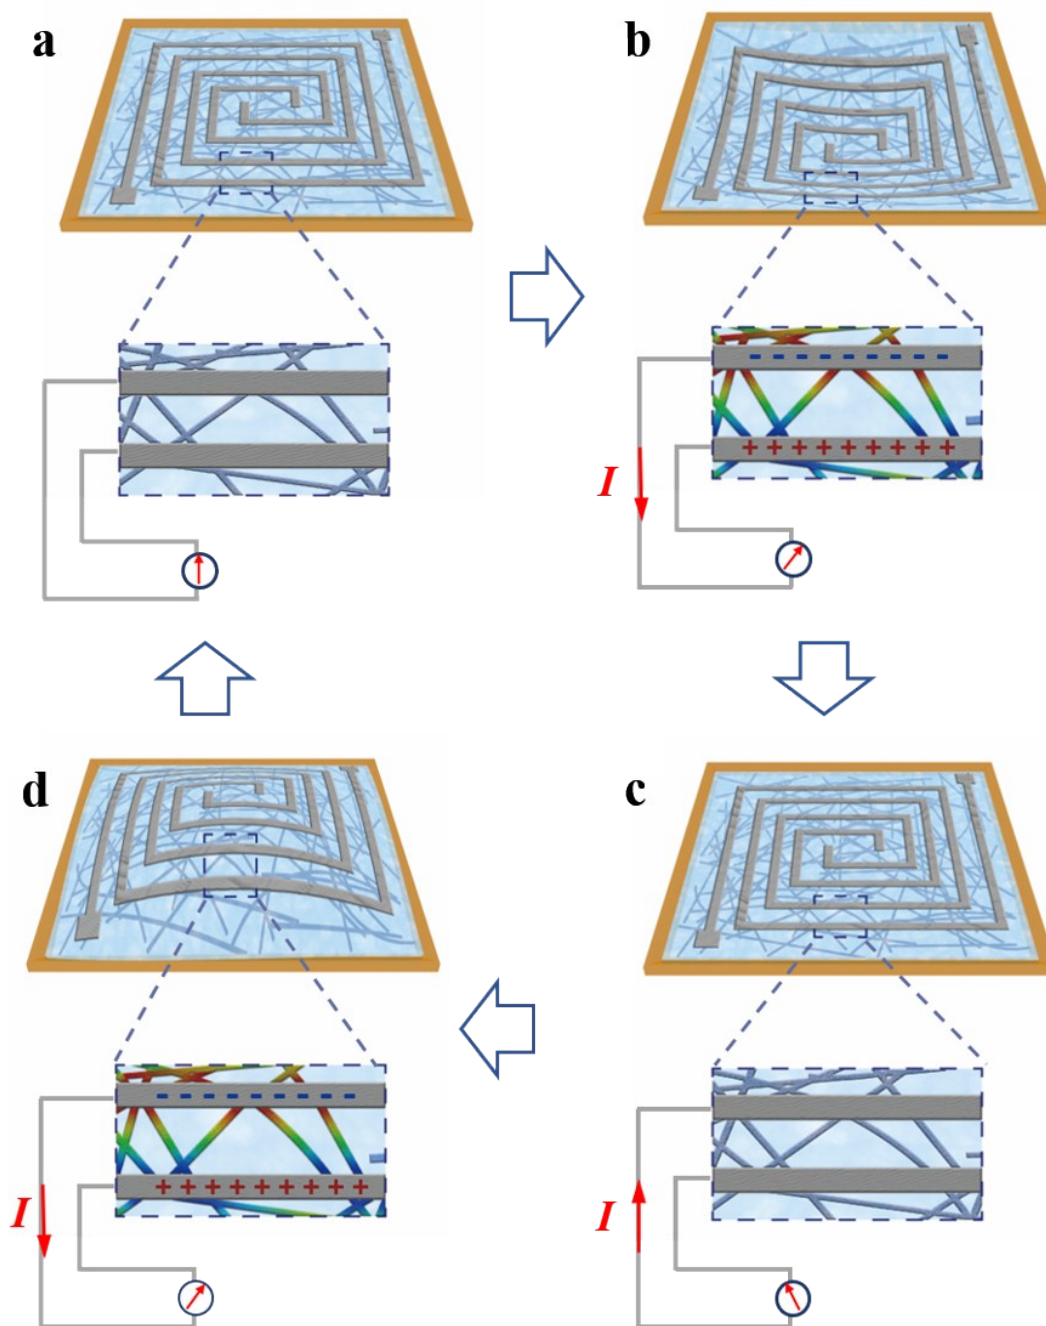

**Figure S1.** The detailed working mechanism of the membrane PENG: (a) the original state of the PENG; (b) the process of the membrane bent downward, where the membrane and nanofibers are stretched and result in a piezoelectric potential, and the external electrons flow to screen the piezoelectric potential and thus form a current; (c) the situation of the membrane recovered, where the piezoelectric potential disappears and the external electrons flow reversely to the original state and form a reverse

S-2

current; (d) the process of the membrane bent upward, where the membrane and nanofibers are still stretched and result in a piezoelectric potential similar to (b).

**Derivation S1.** The derivation process of equation 2.

$$\frac{V^2}{R} = kI$$

$$\frac{V^2}{RI_0} = k \frac{I}{I_0}$$

$$\log_{10} \frac{V^2}{RI_0} = \log_{10} k \frac{I}{I_0}$$

$$\log_{10} V^2 - \log_{10} RI_0 = \log_{10} k + \log_{10} \frac{I}{I_0}$$

$$2\log_{10} V - \log_{10} RI_0 = 0.1SIL + \log_{10} k$$

$$\log_{10} V = \frac{1}{20}SIL + \frac{1}{2}(\log_{10} k + \log_{10} RI_0)$$

$V$  is the peak to peak value of voltage,  $SIL$  is the sound intensity,  $SIL = 10\log_{10} I/I_0$ ,  $I$  is the energy flux density of sound,  $I_0$  is the basic parameter which equals to  $10^{-12}$   $Wm^{-2}$ ,  $R$  is the load resistance which equals to  $100\ M\Omega$ , and  $k$  is a scale factor which is related to the energy conversion efficiency.

**Derivation S2.** The derivation process of the energy exchange efficiency  $\mu$ .

First, we can get the intercept of the fitting is -4.76,

$$\text{and } \frac{1}{2}(\log_{10} k + \log_{10} RI_0) = -4.76487$$

$$k = 2.953E - 6.$$

The voltage curve follows a sine function, so

$$P_{power} = \frac{\left(\frac{V/2}{\sqrt{2}}\right)^2}{RS} = \mu I$$

$$\frac{V^2}{R} = 8 \times S \mu I$$

so

$$k = 8 \times S \mu.$$

$S$  is the active area of the vibrating membrane which equals to  $0.43 \times 10^{-4} \text{ m}^2$ . So the energy exchange efficiency  $\mu$  equals to 0.86 %.

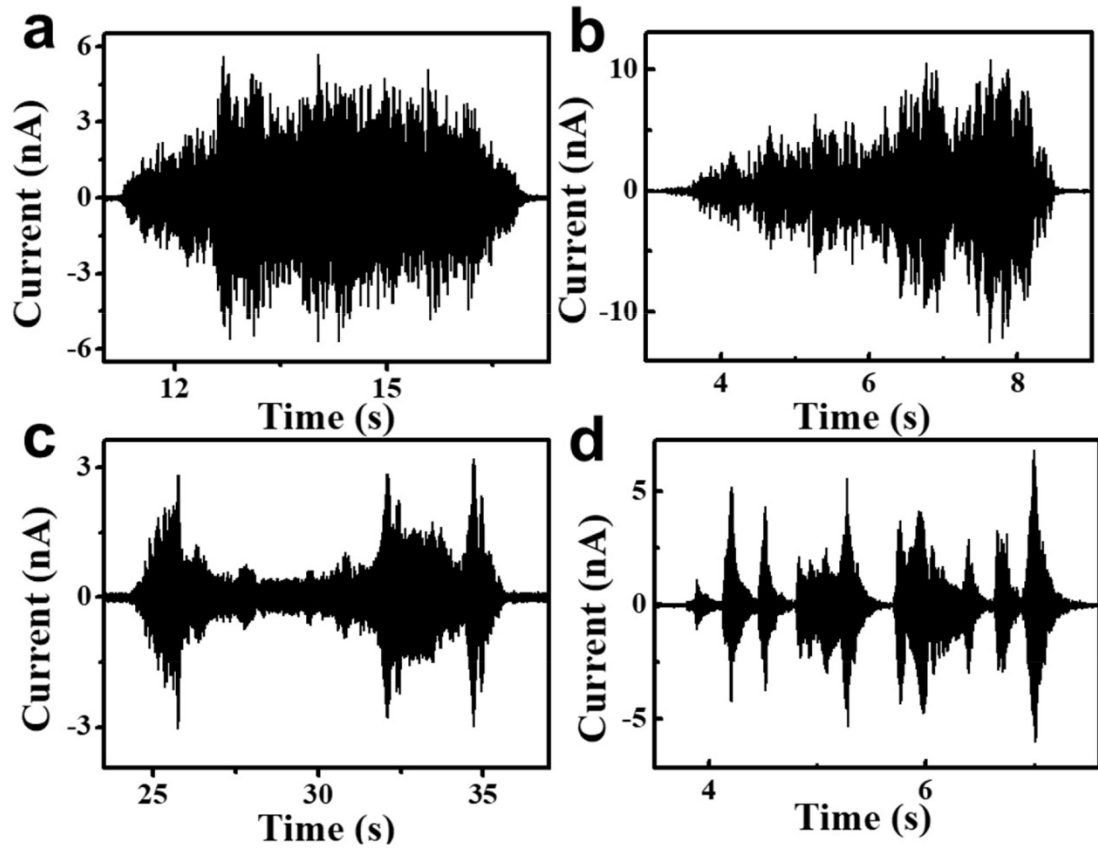

**Figure S2.** Current responses of PENG to (a) the noise of a simulative workshop; (b) the sound of a helicopter taking off; (c) the sound of an alarm; (d) a man's voice saying "Merry Christmas!"

**Video S1.** A restored song converted from the output current signals of the PENG.
